# Supplementary material
Source: publisher figshare collection journal article supplement (https://springernature.figshare.com/ndownloader/files/12979268)
Supplement: Supplementary file [file 12979268]

| Table S1 ANOVA of effects of residence time (RT) and anaerobic/aerobic sampling method on total carbohydrate solubilization. |       |          |                      |         |         |
|------------------------------------------------------------------------------------------------------------------------------|-------|----------|----------------------|---------|---------|
| Factor information                                                                                                           |       |          |                      |         |         |
| Factor                                                                                                                       | Type  | Levels   | Values               |         |         |
| RT (days)                                                                                                                    | Fixed | 4        | 3.3, 5.0, 10.0, 20.0 |         |         |
| Sampling method                                                                                                              | Fixed | 2        | Aerobic, Anaerobic   |         |         |
| Analysis of variance                                                                                                         |       |          |                      |         |         |
| Source                                                                                                                       | DF    | Adj SS   | Adj MS               | F-Value | P-Value |
| RT (days)                                                                                                                    | 3     | 0.151656 | 0.050552             | 162.08  | <0.001  |
| Sampling method                                                                                                              | 1     | 0.000493 | 0.000493             | 1.58    | 0.217   |
| RT*Sampling method                                                                                                           | 3     | 0.004966 | 0.001655             | 5.31    | 0.004   |
| Error                                                                                                                        | 36    | 0.011228 | 0.000312             |         |         |
| Total                                                                                                                        | 43    | 0.168392 |                      |         |         |

A two-way ANOVA was conducted with Minitab 17 Statistical Software (State College, PA: Minitab, Inc. ([www.minitab.com](http://www.minitab.com))) on a sample of 44 data points to investigate the effect of residence time (RT) and sampling method on total carbohydrate solubilization. Analysis showed that RT had significant ( $p < 0.001$ ) effect on solubilization, while there was no significant difference ( $p = 0.217$ ) between aerobic sampling and anaerobic sampling method. The interaction between the effects of RT and sampling method on solubilization was also significant ( $p = 0.004$ ).
